# Supplementary material for: Tris-(hydroxyamino)triazines: high-affinity chelating tridentate O,N,O-hydroxylamine ligand for the cis-VVO2+ cation
Source: Royal Society of Chemistry journal article supplement (doi:10.1039/c0dt00574f), 2010-01-01
Supplement: c0dt00574f.pdf [file c0dt00574f.pdf]

## **Supplementary Material**

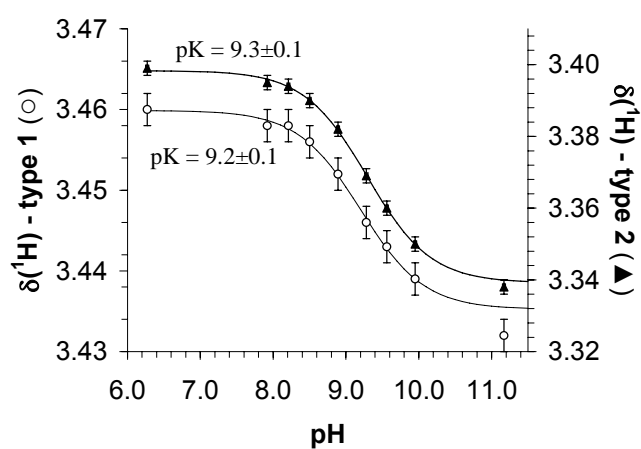

Figure S11

**Fig. S11** The pH dependence of the  $^1\text{H}$  chemical shifts of  $\text{V}^{\text{V}}$ -trihydrate complexes formed in solution.  $C_{\text{V}} = 4.0 \times 10^{-3} \text{ M}$ ,  $\text{L} : \text{M} = 1$ ,  $I = 0.20 \text{ M KCl}$ . The samples contain 10%  $\text{D}_2\text{O}$ . Type 1 hydrogen marked with  $\circ$  (left axis) and type 2 with  $\blacktriangle$  (right axis).

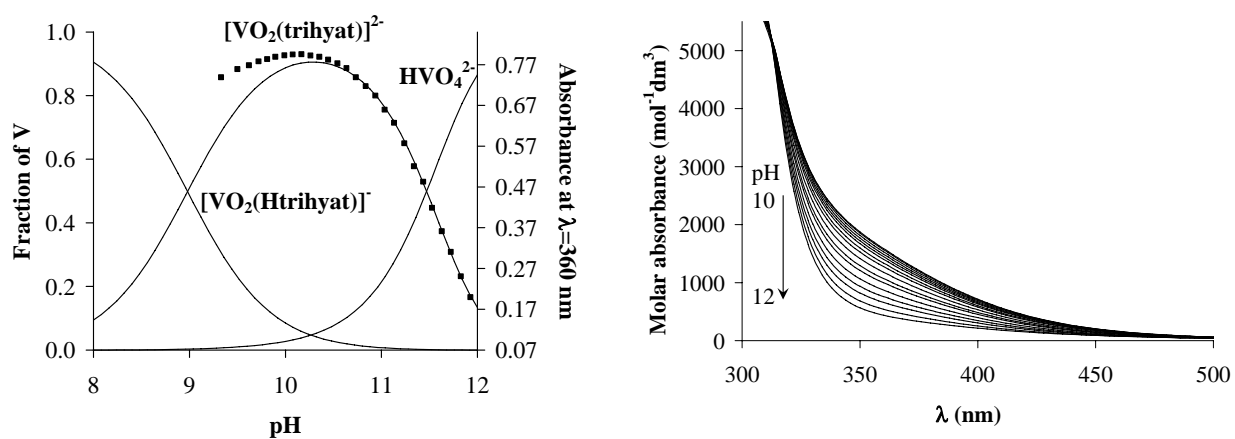

Figure SI2

**Fig. SI2** A) Concentration distribution curves of  $V^V$ -trihyat complexes formed in solutions with  $c_V = 2.6 \times 10^{-4}$  M and  $L:M \sim 1$ , calculated by using the stability constants listed in Table 1 together with the observed absorbance at  $\lambda = 360$  nm. B) The molar absorbances at the same conditions, in the pH range 10-12.
